# Supplementary material for: Multifunctional reduced graphene oxide-CVD graphene core–shell fibers
Source: Royal Society of Chemistry journal article supplement (doi:10.1039/c8nr07527a), 2019-01-01
Supplement: c8nr07527a1.pdf [file c8nr07527a1.pdf]

## Supporting Information for

# Multifunctional Reduced Graphene Oxide-CVD Graphene Core-Shell Fibers

Yong Seok Choi,<sup>a†</sup> Chang-su Yeo,<sup>b,c†</sup> Sang Jin Kim,<sup>d</sup> Jin-Young Lee,<sup>e</sup> Youngsoo Kim,<sup>f</sup> Kang Rae Cho,<sup>g</sup>  
Sanghyun Ju,<sup>h</sup> Byung Hee Hong<sup>a,b\*</sup> and Sang Yoon Park<sup>b\*</sup>

a. Department of Chemistry, Seoul National University, Gwanak\_599, Gwanak-ro, Gwanak-gu, Seoul 151-747, Republic of Korea. Fax: 02-889-1568; Tel: 02-880-6569; E-mail: cyscell@snu.ac.kr, byunghee@snu.ac.kr

b. Advanced Institute of Convergence Technology, Seoul National University, Suwon-si, Gyeonggi-do 16229, Republic of Korea. E-mail: toycs112@snu.ac.kr, yoonpark77@snu.ac.kr

c. Department of Physics, Sungkyunkwan University, Suwon, Korea.

d. Applied Quantum Composites Research Center, Institute of Advanced Composite Materials, Korea Institute of Science and Technology, Republic of Korea

e. Department of Chemical Engineering & Biotechnology, Korea Polytechnic University, Republic of Korea.

f. Graphene Square Inc., Inter-University Semiconductor Research Center, Seoul National University, Seoul 08826, Republic of Korea.

g. Department of Research and Development, Puritech Inc., Pyeongtaek 459-040, Korea.

h. Department of Physics, Kyonggi University, Suwon 443-270, Korea.

## Corresponding authors

\*E-mail: (Byung Hee Hong) byunghee@snu.ac.kr

\*E-mail: (Sang Yoon Park) yoonpark77@snu.ac.kr

(a)

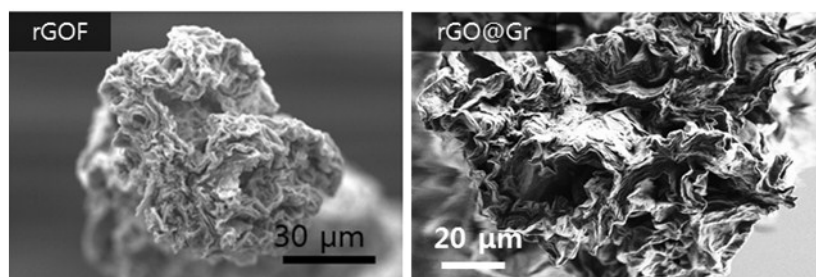

(b)

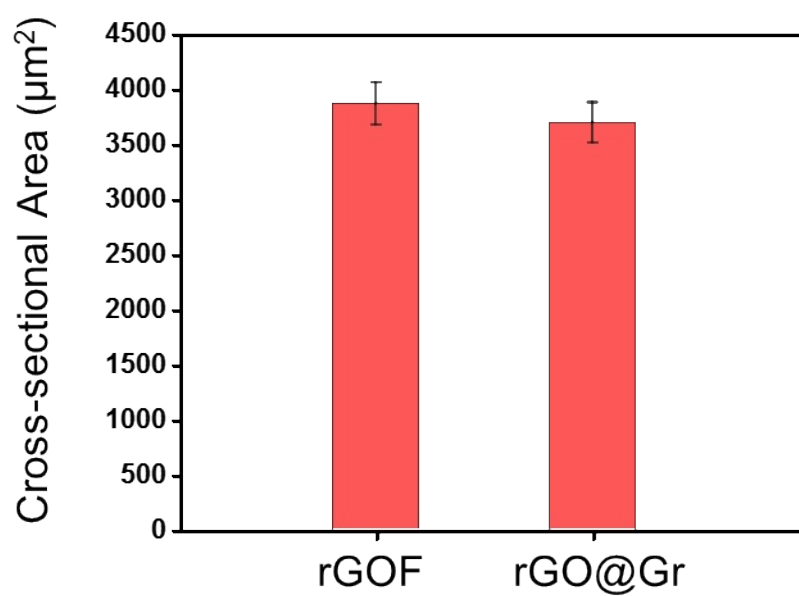

**Figure S1.** (a-b) The cross-sectional SEM images and the corresponding cross-sectional areas of rGO and rGO@Gr fibers.
